# Supplementary material for: Glut1 promotes cell proliferation, migration and invasion by regulating epidermal growth factor receptor and integrin signaling in triple-negative breast cancer cells
Source: PubMed Central journal article supplement — BMB Rep. 2017 Mar 31;50(3):132–7. doi: 10.5483/BMBRep.2017.50.3.189 (PMC5422025; doi:10.5483/bmbrep.2017.50.3.189), 2017-03-31

## **Supplementary Material**

Glut1 promotes cell proliferation, migration and invasion by regulating epidermal growth factor receptor and integrin signaling in triple-negative breast cancer cells

Sunhwa Oh<sup>1</sup>, Hyungjoo Kim<sup>1</sup>, KeeSoo Nam<sup>1</sup> and Incheol Shin<sup>1,2,\*</sup>

<sup>1</sup>Department of Life Science, Hanyang University, Seoul, 133-791, Korea

<sup>2</sup>Natural Science Institute, Hanyang University, Seoul, 133-791, Korea

## **Corresponding Author**

Incheol Shin, Ph.D

Department of Life Science

Hanyang University

Seoul, 133-791, Korea

Tel: (82) 2-2220-2562

FAX: (82) 2-2298-2562

E-mail: incheol@hanyang.ac.kr

**Running Title:** Glut1 regulates tumorigenesis of breast cancer

## **Supplementary MATERIALS AND METHODS**

### **Glucose uptake**

Cells were seeded at  $5 \times 10^3$  cells/well in 96-well plates. After 48 h, the levels of glucose uptake were measured with a Glucose Uptake Cell-Based Assay Kit (Cayman Chemical, Ann Arbor, MI, USA) according to the manufacturer's protocol. Relative fluorescence units were determined at 485-535 nm using a Varioskan Flash (Thermo, Waltham, MA, USA).

### **ATP assays**

Cellular levels of ATP were determined with a CellTiter-Glo Luminescent Cell Viability Assay (Promega). Cells were seeded at  $5 \times 10^3$  cells/well in 96-well plates. After 24, 48, or 72 h, 100  $\mu$ l of CellTiter-Glo® Reagent was added to each well without removing the cell culture medium and incubated for 15 min at room temperature. Cellular ATP levels were measured by luminescence using a Varioskan Flash.

### **Lactate production**

Cells were seeded in 100-mm dishes at a density of  $1 \times 10^6$  cells/dish and the levels of lactate production were examined with a Lactate Assay Kit (Biovision, Milpitas, CA, USA). After 24 h, the culture medium was replaced with FBS-free DMEM. After further incubation for 8 h, cultured media were harvested and lactate levels in the media were analyzed by colorimetric assay. Optical density was measured at 590 nm using a Multiskan EX (Thermo).

### **LDH zymography**

Proteins were prepared from each cell line and 30- $\mu$ g samples were subjected to native gel electrophoresis. After electrophoresis, the gels were stained in 10 ml of solution containing

lithium lactate, NAD, Tris-HCl (pH 8.0), NaCl, MgCl<sub>2</sub>, phenazine methosulfate (PMS), and nitroblue tetrazolium (NBT) for 10 min at room temperature.

## **Supplementary Figure legend**

### **Supplementary Figure S1. Expression of Glut1 according to breast cancer subtype**

Total cell lysates were prepared from MCF7, T47D, BT474, SKBR3, MDA-MB-231 and Hs578T cells and subjected to Western blot analyses with Glut1 and  $\beta$ -tubulin antibodies.

### **Supplementary Figure S2. Effects of Glut1 silencing on proliferation of MCF7 and T47D cells**

Control shRNA cells (MCF7 Cont sh and T47D Cont sh) and Glut1 shRNA cells (MCF7 Glut1 sh and T47D Glut1 sh) were seeded at  $1 \times 10^4$  cells/well in 12-well plates and counted with a hemocytometer over 4 days ( $*p < 0.05$ ).

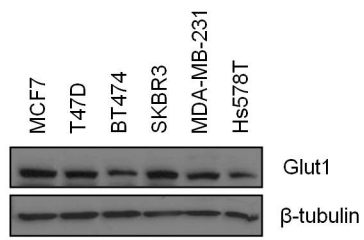

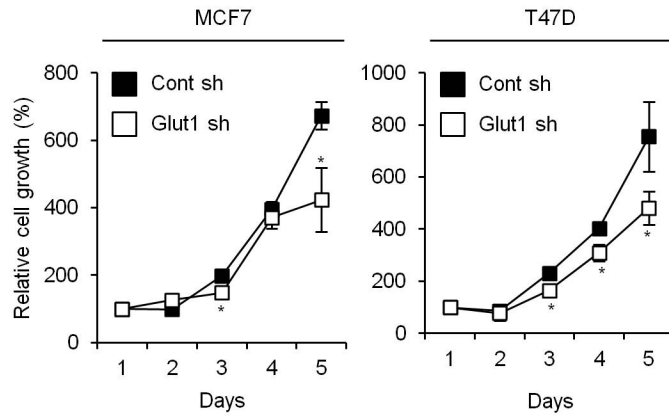

Supplement: bmb-50-132_suppl.pdf [file bmb-50-132_suppl.pdf]
